# Supplementary figures and images for: CDK4/6 inhibition enhances antitumor efficacy of chemotherapy and immune checkpoint inhibitor combinations in preclinical models and enhances T-cell activation in patients with SCLC receiving chemotherapy
Source: PubMed Central journal article supplement — J Immunother Cancer. 2020 Oct 1;8(2):e000847. doi: 10.1136/jitc-2020-000847 (PMC7534680; doi:10.1136/jitc-2020-000847), 2020-10-01

A

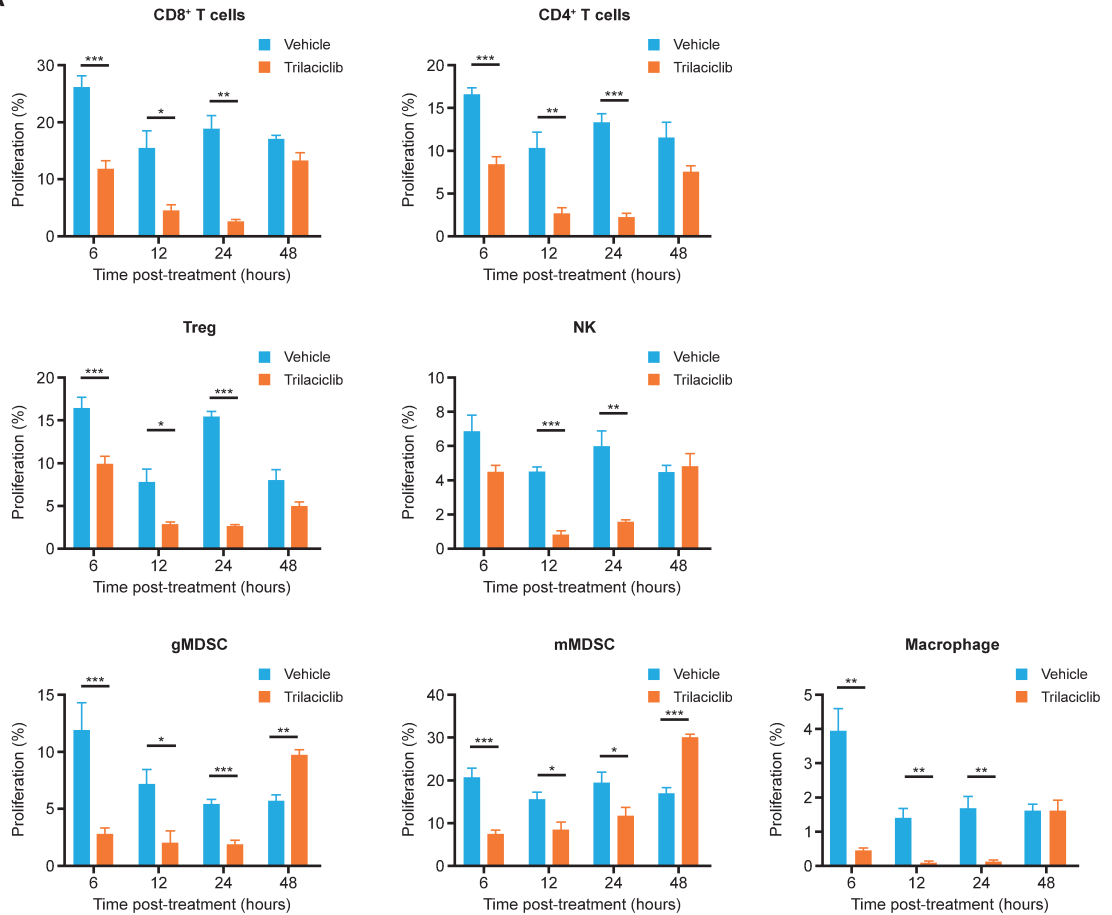

B

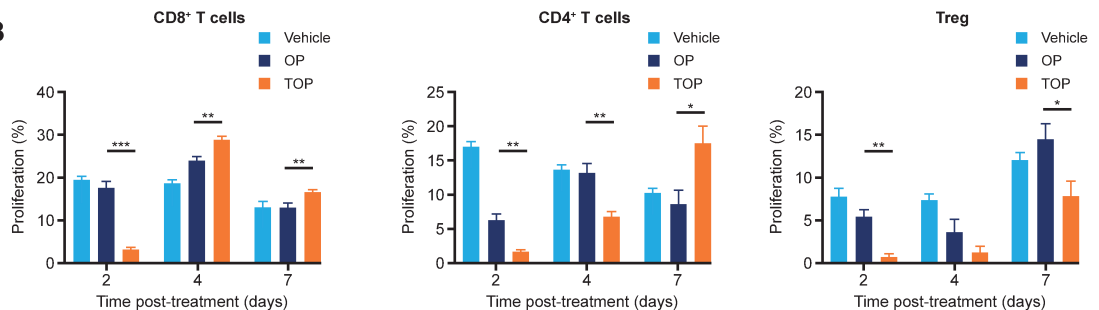

Supplement: jitc-2020-000847supp004.pdf [file jitc-2020-000847supp004.pdf]

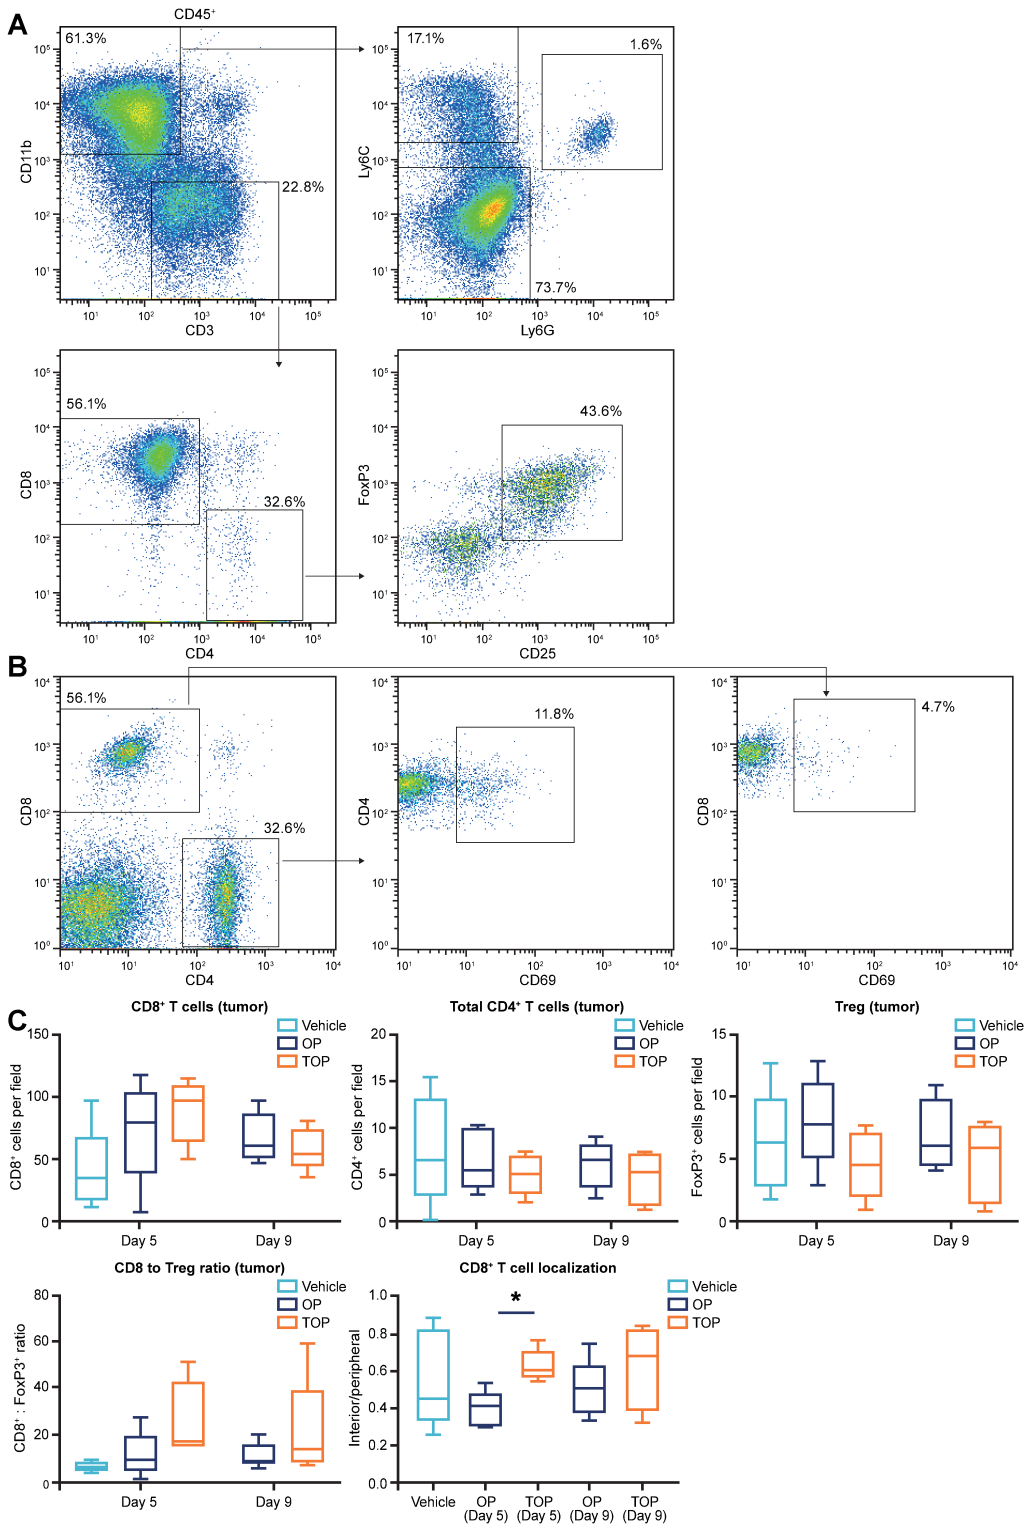

Supplement: jitc-2020-000847supp005.pdf [file jitc-2020-000847supp005.pdf]
